# Supplementary material
Source: HighWire-hosted journal article supplement (https://www.annfammed.org/highwire/filestream/8781/field_highwire_adjunct_files/0/Whitley_Supp_App.pdf)
Supplement: Whitley_Supp_App.pdf [file Whitley_Supp_App.pdf]

Supplemental materials for:

Whitley HP, Hanson C, Parton J. Systematic diabetes screening using point-of-care A1C testing facilitates identification of prediabetes. *Ann Fam Med.* 2017;15(2):162-164.

## Appendix 1: Consort Diagram for Screening and Enrollment

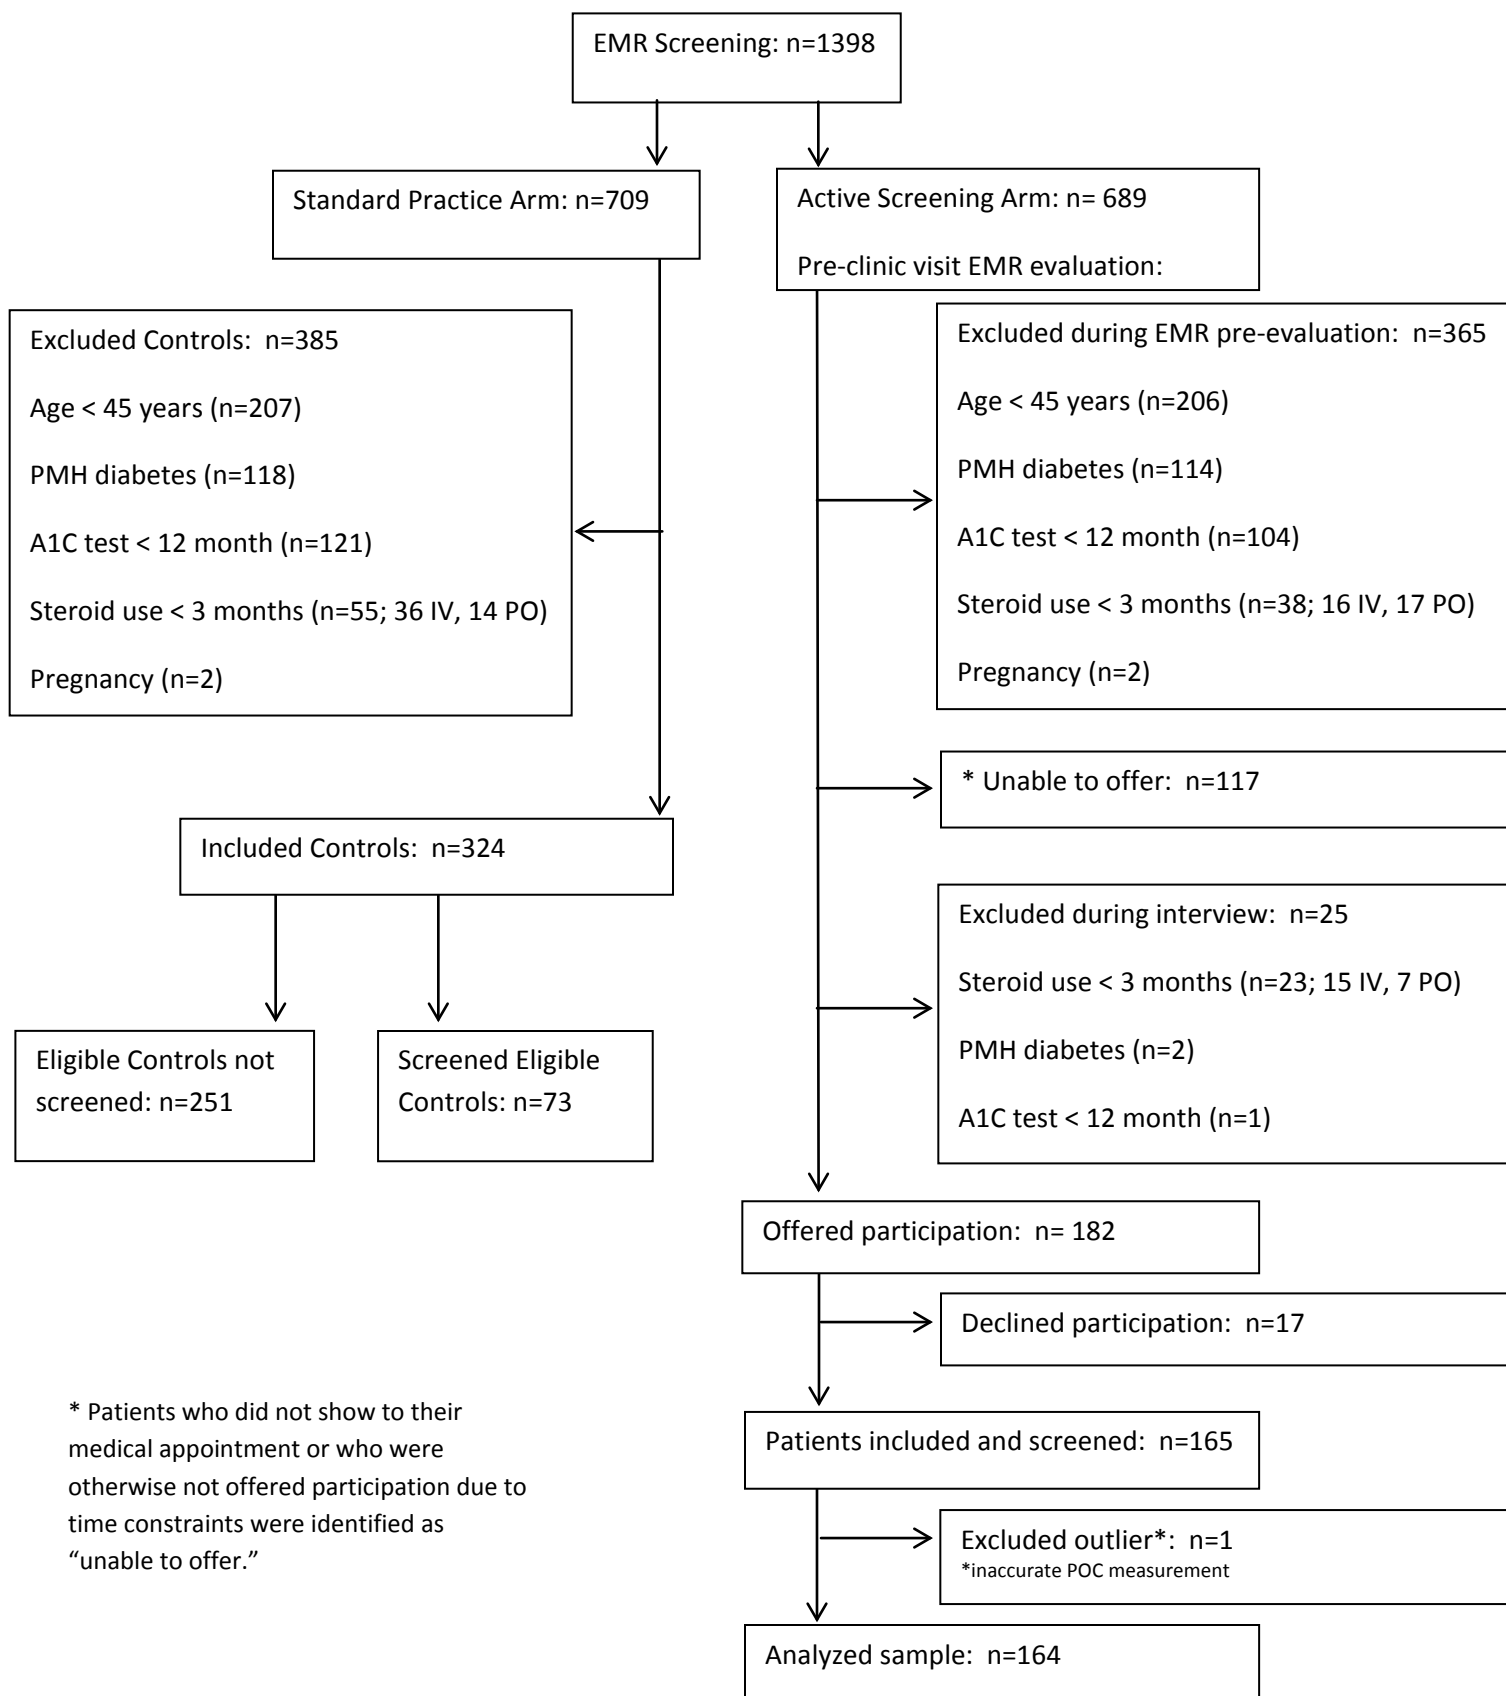

\* Patients who did not show to their medical appointment or who were otherwise not offered participation due to time constraints were identified as "unable to offer."
